# Supplementary material for: A novel carbazole-based fluorometric and colorimetric sensor for the highly sensitive and specific detection of Cu2+ in aqueous solution
Source: Royal Society of Chemistry journal article supplement (doi:10.1039/d3ra04571d), 2023-01-01

## **A novel carbazole-based highly sensitive and selective turn-off fluorescent probe for Cu<sup>2+</sup> in aqueous DMSO**

### **Figure caption:**

**Fig. S1** The <sup>1</sup>H NMR spectra of **PCB**

**Fig. S2** (a) The full <sup>13</sup>C NMR spectra of **PCB**. (b) The specific region of <sup>13</sup>C NMR spectra of **PCB**.

**Fig. S3** The LC-MS spectra of **PCB**

**Fig. S4** The <sup>1</sup>H NMR spectra of **PCBW**

**Fig. S5** (a) The full <sup>13</sup>C NMR spectra of **PCBW**. (b) The specific region of <sup>13</sup>C NMR spectra of **PCBW**.

**Fig. S6** The HRMS spectra of **PCBW**

**Fig. S7** The HRMS spectra of **PCBW-Cu<sup>2+</sup>**

**Fig. S8** The *K<sub>a</sub>* between **PCBW** probe and Cu<sup>2+</sup> by using bindfit software to calculate

**Fig. S9** The UV-vis spectra of **PCBW** (1 × 10<sup>-5</sup> mol·L<sup>-1</sup>) in DMSO-H<sub>2</sub>O mixture solution with different water content

**Fig. S10** Digital photograph of different concentrations of Cu<sup>2+</sup> (1 μM, 2 μM, 2.5 μM, 3.3 μM, 5 μM, 10 μM) in **PCBW** probe solution under long wavelength UV lamp light

**Fig. S11** Particle size of **PCBW** at different moisture contents detected by DLS

Fig. S1

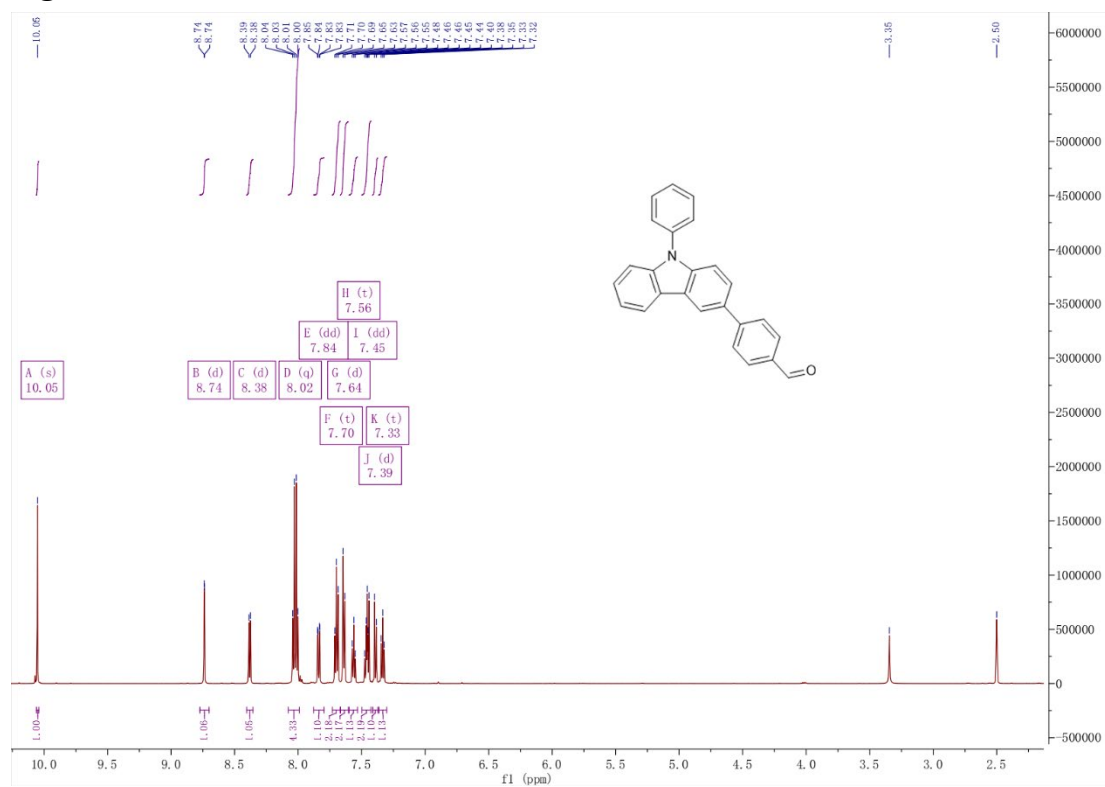

Fig. S2



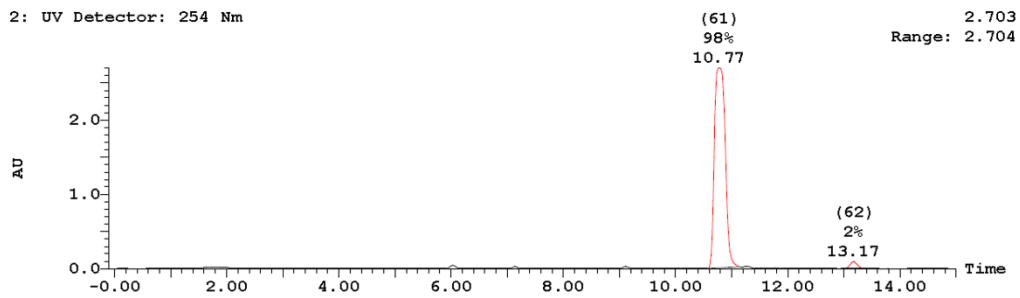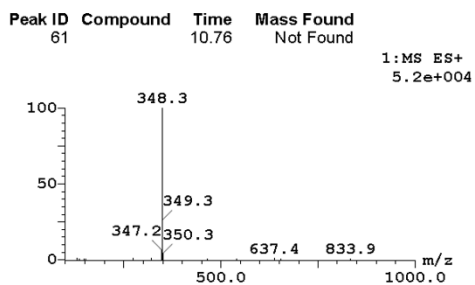

Fig. S4

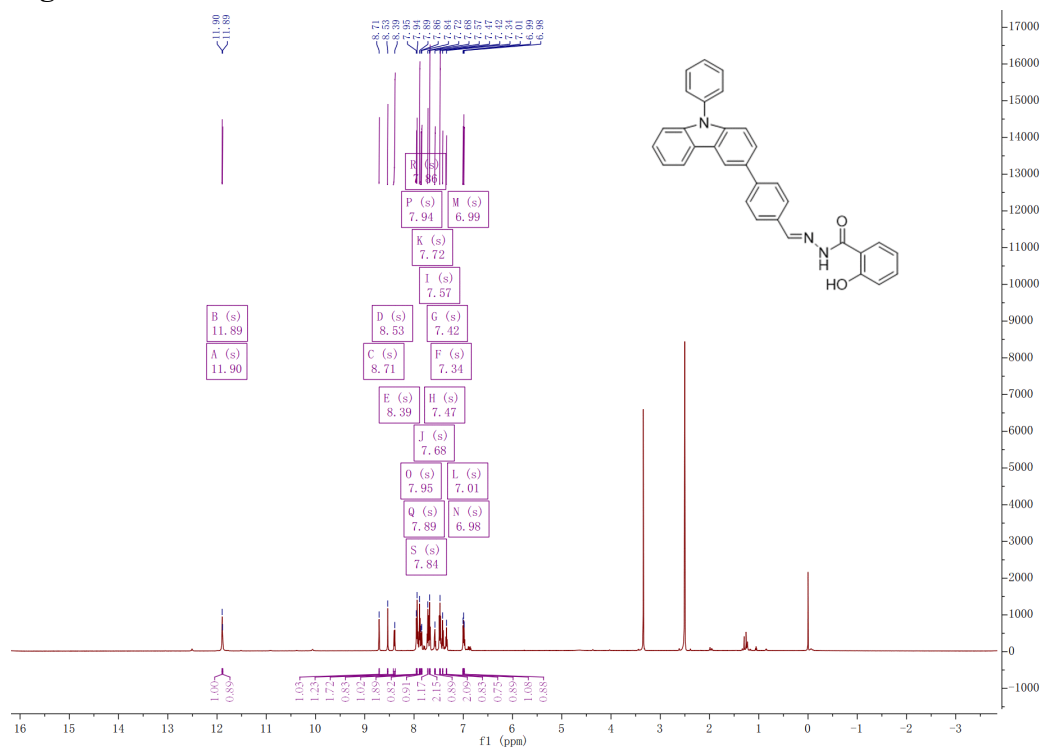

Fig. S5

(a)

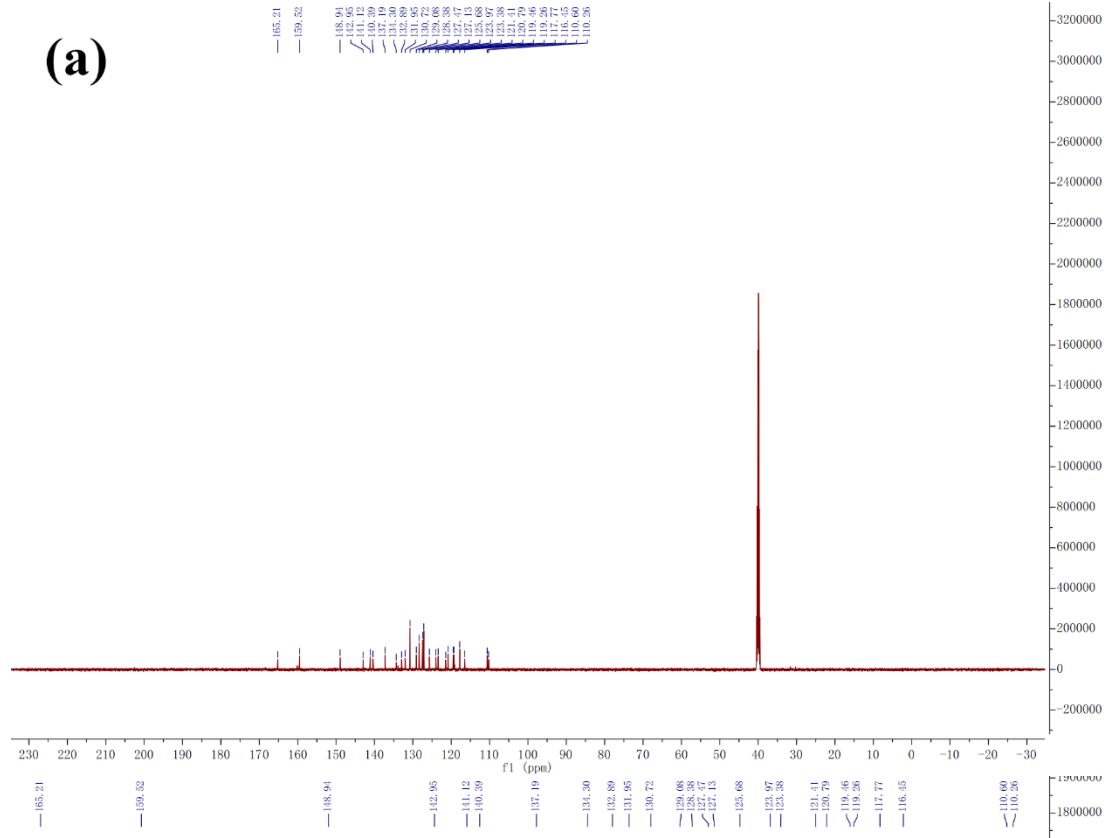

(b)

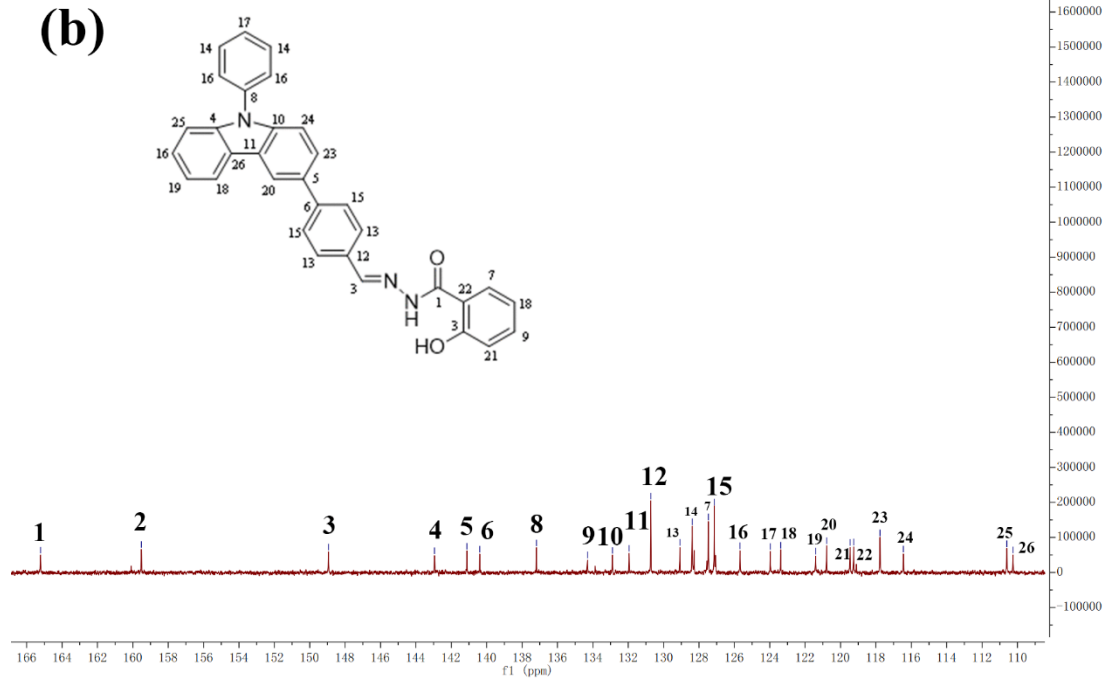

**Fig. S6**

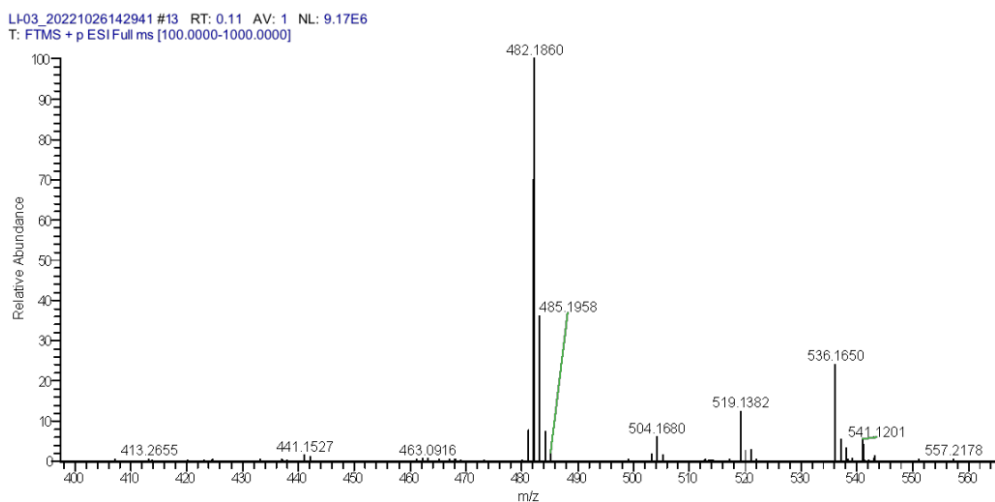

Elemental composition search on mass 482.1860

m/z = 477.1860-487.1860

| m/z      | Theo. Mass | Delta (ppm) | RDB equiv. | Composition                                                   |
|----------|------------|-------------|------------|---------------------------------------------------------------|
| 482.1860 | 482.1863   | -0.55       | 22         | C <sub>32</sub> H <sub>24</sub> O <sub>2</sub> N <sub>3</sub> |

**Fig. S7**

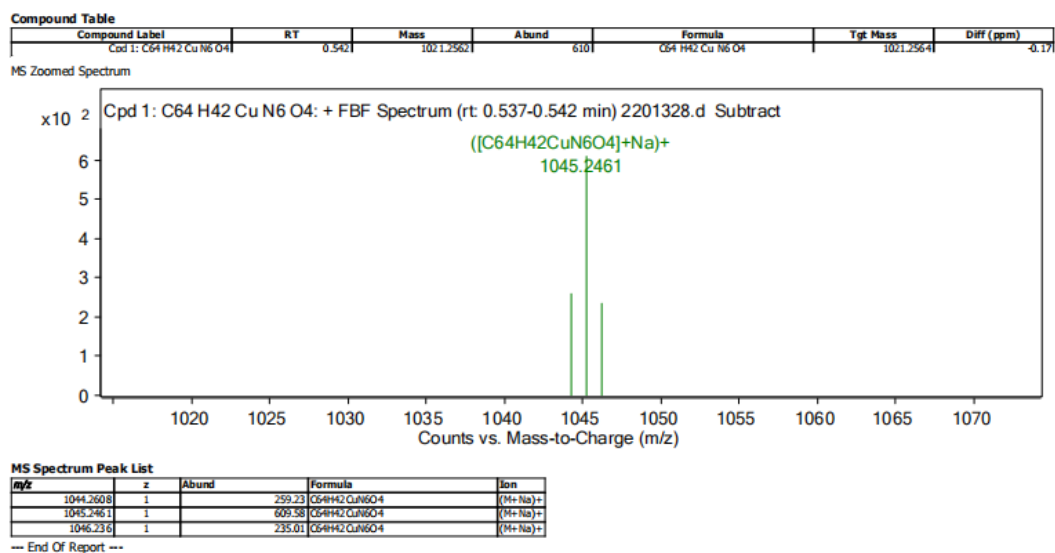

**Fig. S8** The  $K_a$  between PCBW probe and Cu<sup>2+</sup> by using bindfit software to calculate

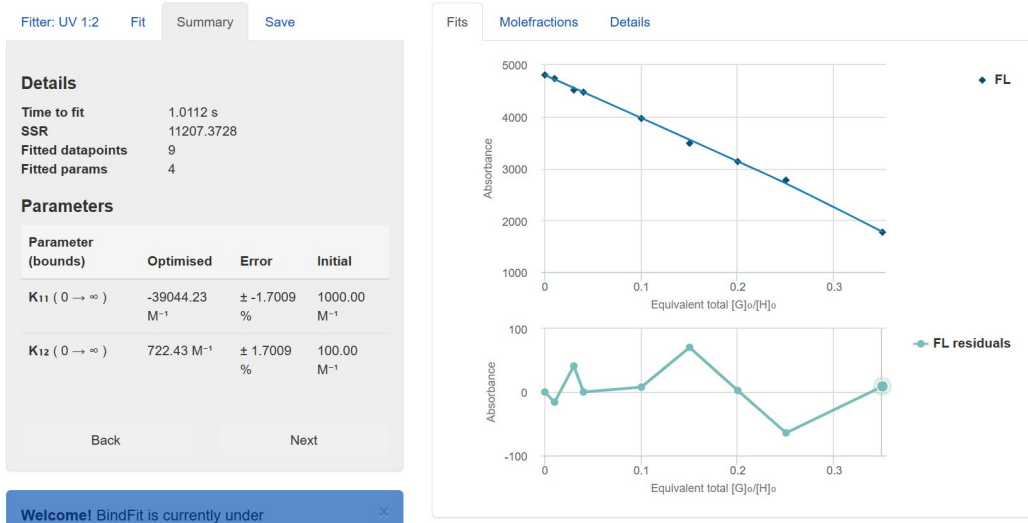

Fig. S9

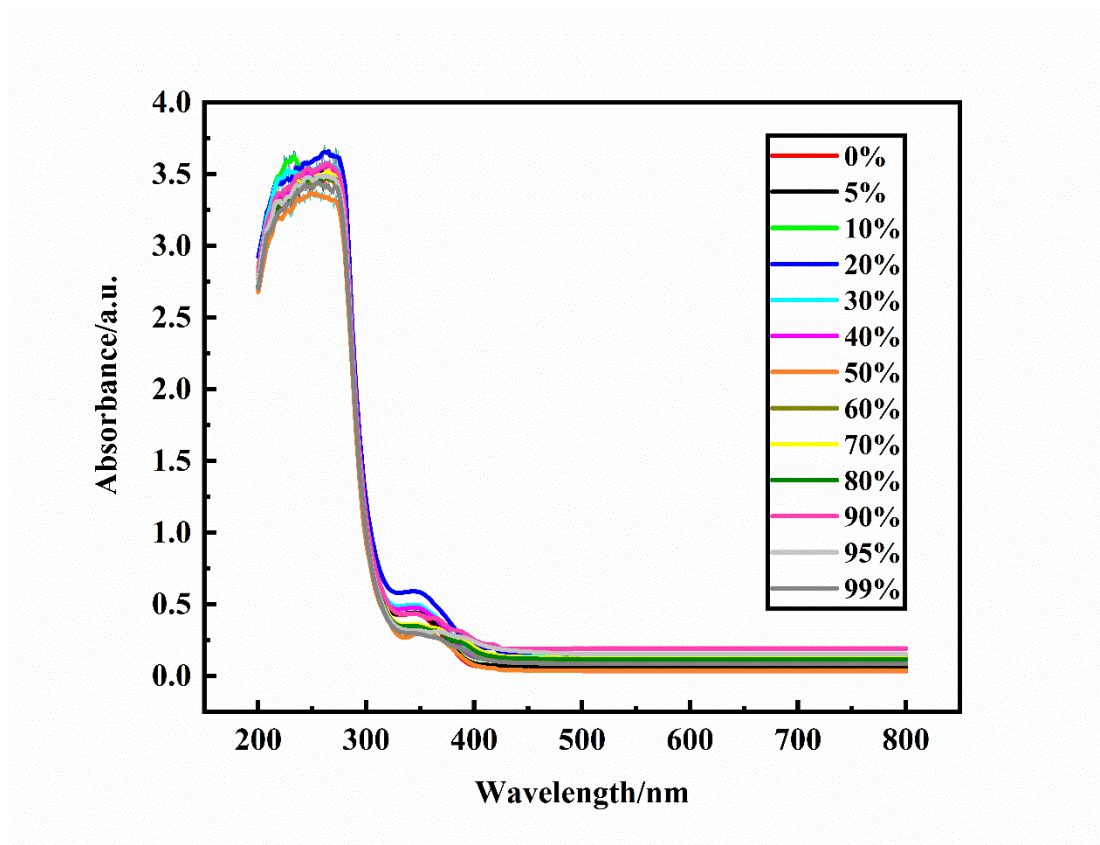

Fig. S10

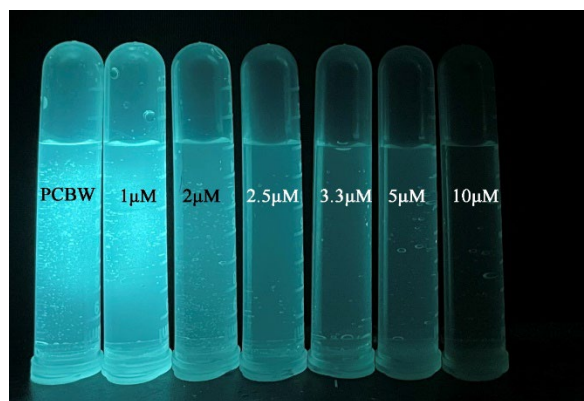

Fig. S11

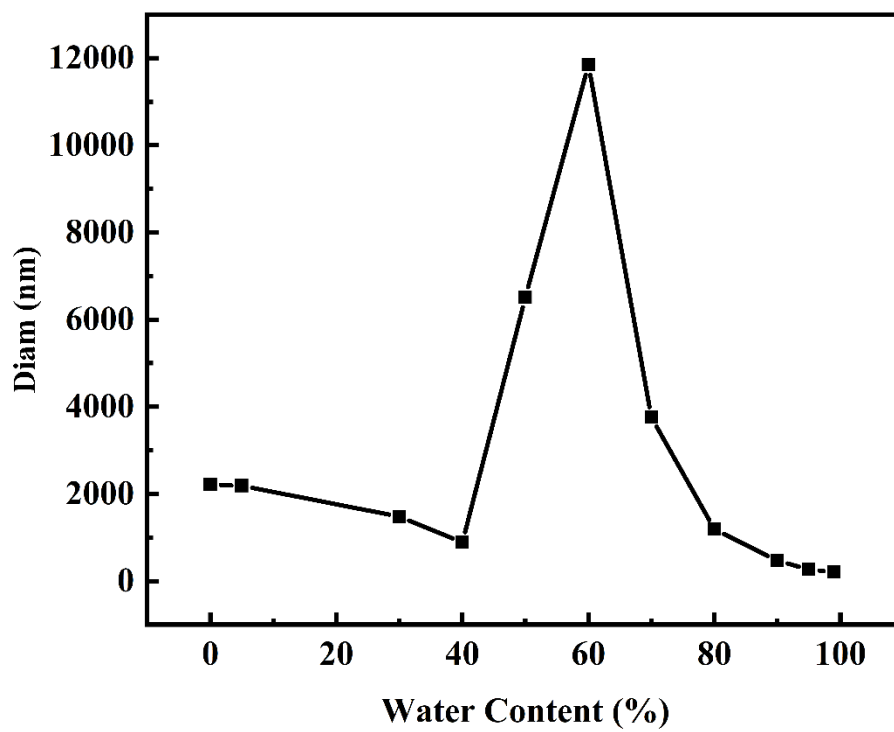

Supplement: d3ra04571d1.pdf [file d3ra04571d1.pdf]
